# Supplementary material for: Effect of Traditional Chinese Medicine Poge Heart-Saving Decoction on Cardiac Function in Heart Failure Rat Model
Source: PubMed Central journal article supplement (PMC7895586; doi:10.1155/2020/8762509), 2020-12-03

**abstract**

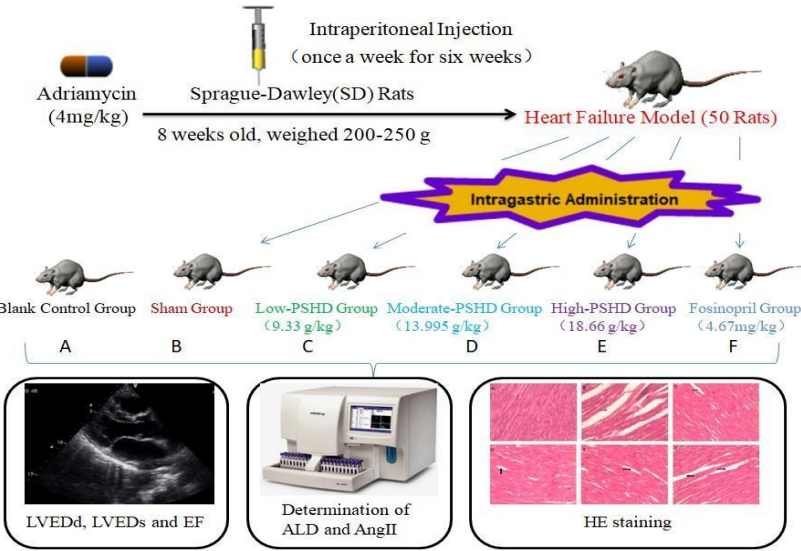

Supplement: 8762509.f1.pdf [file 8762509.f1.pdf]
